# Supplementary material
Source: Springer Nature journal article supplement (https://www.springermedizin.de/resource/supplementary/12913_2008_795_MOESM8_ESM.pdf/9535598)
Supplement: MOESM8 [file 9535598]

**Table 5: Important methodological aspects adapted from CONSORT [25,26]**

| #    | Methods paragraph                                                                                                                                                                                                                                                                       | Results paragraph                                                                                                                                                                                                                                                                                                                                                                                                                                  | Other shortcomings                                                                                                                                                                                                                                                                                                                                                                                               |
|------|-----------------------------------------------------------------------------------------------------------------------------------------------------------------------------------------------------------------------------------------------------------------------------------------|----------------------------------------------------------------------------------------------------------------------------------------------------------------------------------------------------------------------------------------------------------------------------------------------------------------------------------------------------------------------------------------------------------------------------------------------------|------------------------------------------------------------------------------------------------------------------------------------------------------------------------------------------------------------------------------------------------------------------------------------------------------------------------------------------------------------------------------------------------------------------|
|      | Clearly described:<br>a) intervention and control group exposure<br>b) Sample size measures (preceding intervention start)<br>c) Recruitment data: period, all subsequent patients assessed for in- /exclusion<br>d) Allocation concealment method described<br>e) Blinding of assessor | a) Patient flow and potential diagram<br>b) Characteristics and information on drop-out patients.<br>c) Characteristics of eligible non-participants                                                                                                                                                                                                                                                                                               |                                                                                                                                                                                                                                                                                                                                                                                                                  |
| [22] | a) Yes<br>b) N/A<br>c) 1993-96, yes, both surgeons and patients<br>d) N/A<br>e) yes                                                                                                                                                                                                     | a) No information on number of patients followed-up by interview. No diagram.<br>b) N/A<br>c) N/A                                                                                                                                                                                                                                                                                                                                                  |                                                                                                                                                                                                                                                                                                                                                                                                                  |
| [28] | a) Yes<br>b) N/A<br>c) 1995-97), yes.<br>d) N/A<br>e) N/A                                                                                                                                                                                                                               | a) Dropout from intervention and questionnaire response rate missing. No diagram.<br>b) N/A<br>c) Participants were younger ( $p<0.0001$ ) and were more likely to have invasive disease ( $p=0.003$ ) than non-participants.                                                                                                                                                                                                                      | Effect size measures not specified.<br>Age range for inclusion was outlined differently in Abstract and Methods(?)<br>Other process improvements were implemented during the trial.                                                                                                                                                                                                                              |
| [30] | a) Inadequate description.<br>b) N/A<br>c) 18-month period, yes<br>d) N/A<br>e) N/A                                                                                                                                                                                                     | a) Missing information on numbers allocated to each group and flow of patients through each "arm". No diagram.<br>b) Withdrawal-reason for all 111 patients listed, but no characteristics of these patients.<br>Demographics for the subsample (78 participants) completing four interviews seem comparable to primary included sample of 166 patients (Table 1, but no statistics)<br>c) N/A information on more than 700 eligible not included. | Strengths and weaknesses not discussed.<br>Effect size information wanted.<br>Because of extensive attrition at time for fifth (last) interview (111/166= 66%), only complete data patients at fourth interview (78/ 166) were included in analyses.<br>Study participants not fully representative for lung cancer patients diagnosed in King County, but can be explained on inclusion and exclusion criteria. |
| [29] | a) Yes<br>b) N/A<br>c) 1. 35 months/ 1993-95, N/A                                                                                                                                                                                                                                       | a) Eligible number not mentioned Otherwise, easily understood flow. No diagram.<br>b) N/A, no information on questionnaire non-responders.                                                                                                                                                                                                                                                                                                         | Some patients (control n=58, intervention group n=66) were also referred to home care as part of standard treatment. This was not discussed.                                                                                                                                                                                                                                                                     |

| #    | <b>Methods paragraph</b><br>Clearly described:<br>a) intervention and control group exposure<br>b) Sample size measures (preceding intervention start)<br>c) Recruitment data: period, all subsequent patients assessed for in- /exclusion<br>d) Allocation concealment method described<br>e) Blinding of assessor | <b>Results paragraph</b><br>a) Patient flow and potential diagram<br>b) Characteristics and information on drop-out patients.<br>c) Characteristics of eligible non-participants                                                                                                                                                                                                                                                                                                                                            | <b>Other shortcomings</b>                                                                                                                                                                                                                    |
|------|---------------------------------------------------------------------------------------------------------------------------------------------------------------------------------------------------------------------------------------------------------------------------------------------------------------------|-----------------------------------------------------------------------------------------------------------------------------------------------------------------------------------------------------------------------------------------------------------------------------------------------------------------------------------------------------------------------------------------------------------------------------------------------------------------------------------------------------------------------------|----------------------------------------------------------------------------------------------------------------------------------------------------------------------------------------------------------------------------------------------|
|      | d) Yes<br>e) N/A                                                                                                                                                                                                                                                                                                    | c) N/A (and numbers of eligible not mentioned)                                                                                                                                                                                                                                                                                                                                                                                                                                                                              |                                                                                                                                                                                                                                              |
| [31] | a) Yes<br>b) N/A<br>c) N/A, N/A<br>d) Yes<br>e) N/A                                                                                                                                                                                                                                                                 | a) N/A, No diagram.<br>b) N/A<br>c) N/A                                                                                                                                                                                                                                                                                                                                                                                                                                                                                     | Adjustment for cluster effect not performed, not mentioned or discussed.<br>Rationale for block randomisation not described (is it due to different diagnoses and sites?)<br>Cost and AD analyses were on VAMC patients only (apply to all?) |
| [27] | a) Yes<br>b) Mentioned, but no estimate presented.<br>c) N/A. yes<br>d) N/A<br>e) N/A                                                                                                                                                                                                                               | a) Missing account for 144 patients who did not want to participate. No diagram.<br>b) Attrition analysis: Participants in at least one follow-up were younger ( $p < 0.01$ ) and more likely to be female ( $p < 0.05$ ). Patients diagnosed from lymphoma, lung, pancreatic, or stomach cancer were less likely to be followed-up than breast cancer patients. Patients lost to follow-up were also more likely to have received palliative treatment. No difference between intervention and control patients.<br>c) N/A |                                                                                                                                                                                                                                              |

N/A: Not available
